# Supplementary material for: Seed Biopriming with Microbial Inoculant Triggers Local and Systemic Defense Responses against Rhizoctonia solani Causing Banded Leaf and Sheath Blight in Maize (Zea mays L.)
Source: PubMed Central journal article supplement (PMC7068308; doi:10.3390/ijerph17041396), 2020-02-21
Supplement: ijerph-17-01396-s001.pdf [file ijerph-17-01396-s001.pdf]

Supplementary Material

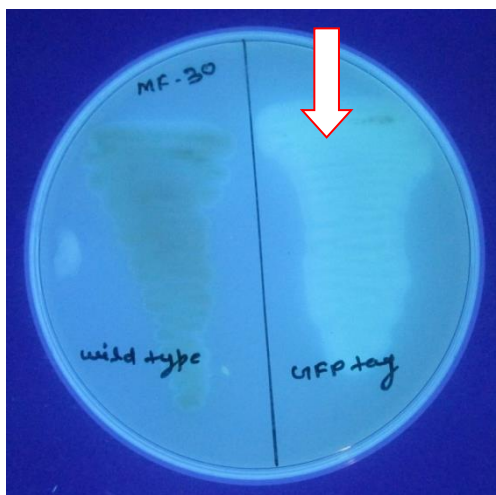

Figure S1. GFP-tagging of *Pseudomonas aeruginosa* MF-30.

Table S1. Qualitative estimation of plant growth promoting and biocontrol attributes in *Pseudomonas aeruginosa* MF-30.

| S.No. | Plant growth promoting attributes | Presence/absence |
|-------|-----------------------------------|------------------|
| 1.    | Phosphorus solubilization         | +ve              |
| 2.    | Potash solubilization             | +ve              |
| 3.    | Zinc solubilization               | +ve              |
| 4.    | IAA production                    | +ve              |
| 5.    | HCN production                    | +ve              |
| 6.    | Siderophore production            | +ve              |
| 7.    | Ammonia production                | +ve              |
| 8.    | Amylase activity                  | +ve              |
| 9.    | Cellulase activity                | +ve              |
| 10.   | Pectinase activity                | +ve              |
| 11.   | Chitinase activity                | +ve              |

| S.No. | Plant growth promoting attributes | Presence/absence                                                                     |
|-------|-----------------------------------|--------------------------------------------------------------------------------------|
| 1.    | Phosphorus solubilization         |    |
| 2.    | Potash solubilization             |    |
| 3.    | Zinc solubilization               |    |
| 4.    | IAA production                    |   |
| 5.    | HCN production                    |  |
| 6.    | Siderophore production            |  |
| 7.    | Ammonia production                |  |
| 8.    | Amylase activity                  |  |

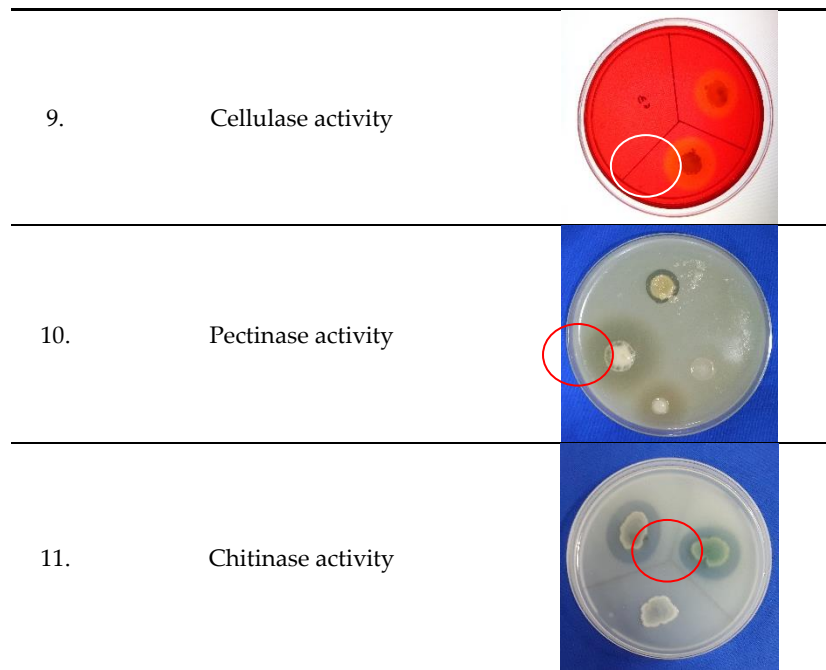

**Figure S2.** Qualitative estimation of plant growth promoting and biocontrol attributes in *Pseudomonas aeruginosa* MF-30.
